# Supplementary material
Source: publisher site journal article supplement (https://www.dovepress.com/article/305361)
Supplement: Supplementary file 1 [file get_supplementary_file.php]

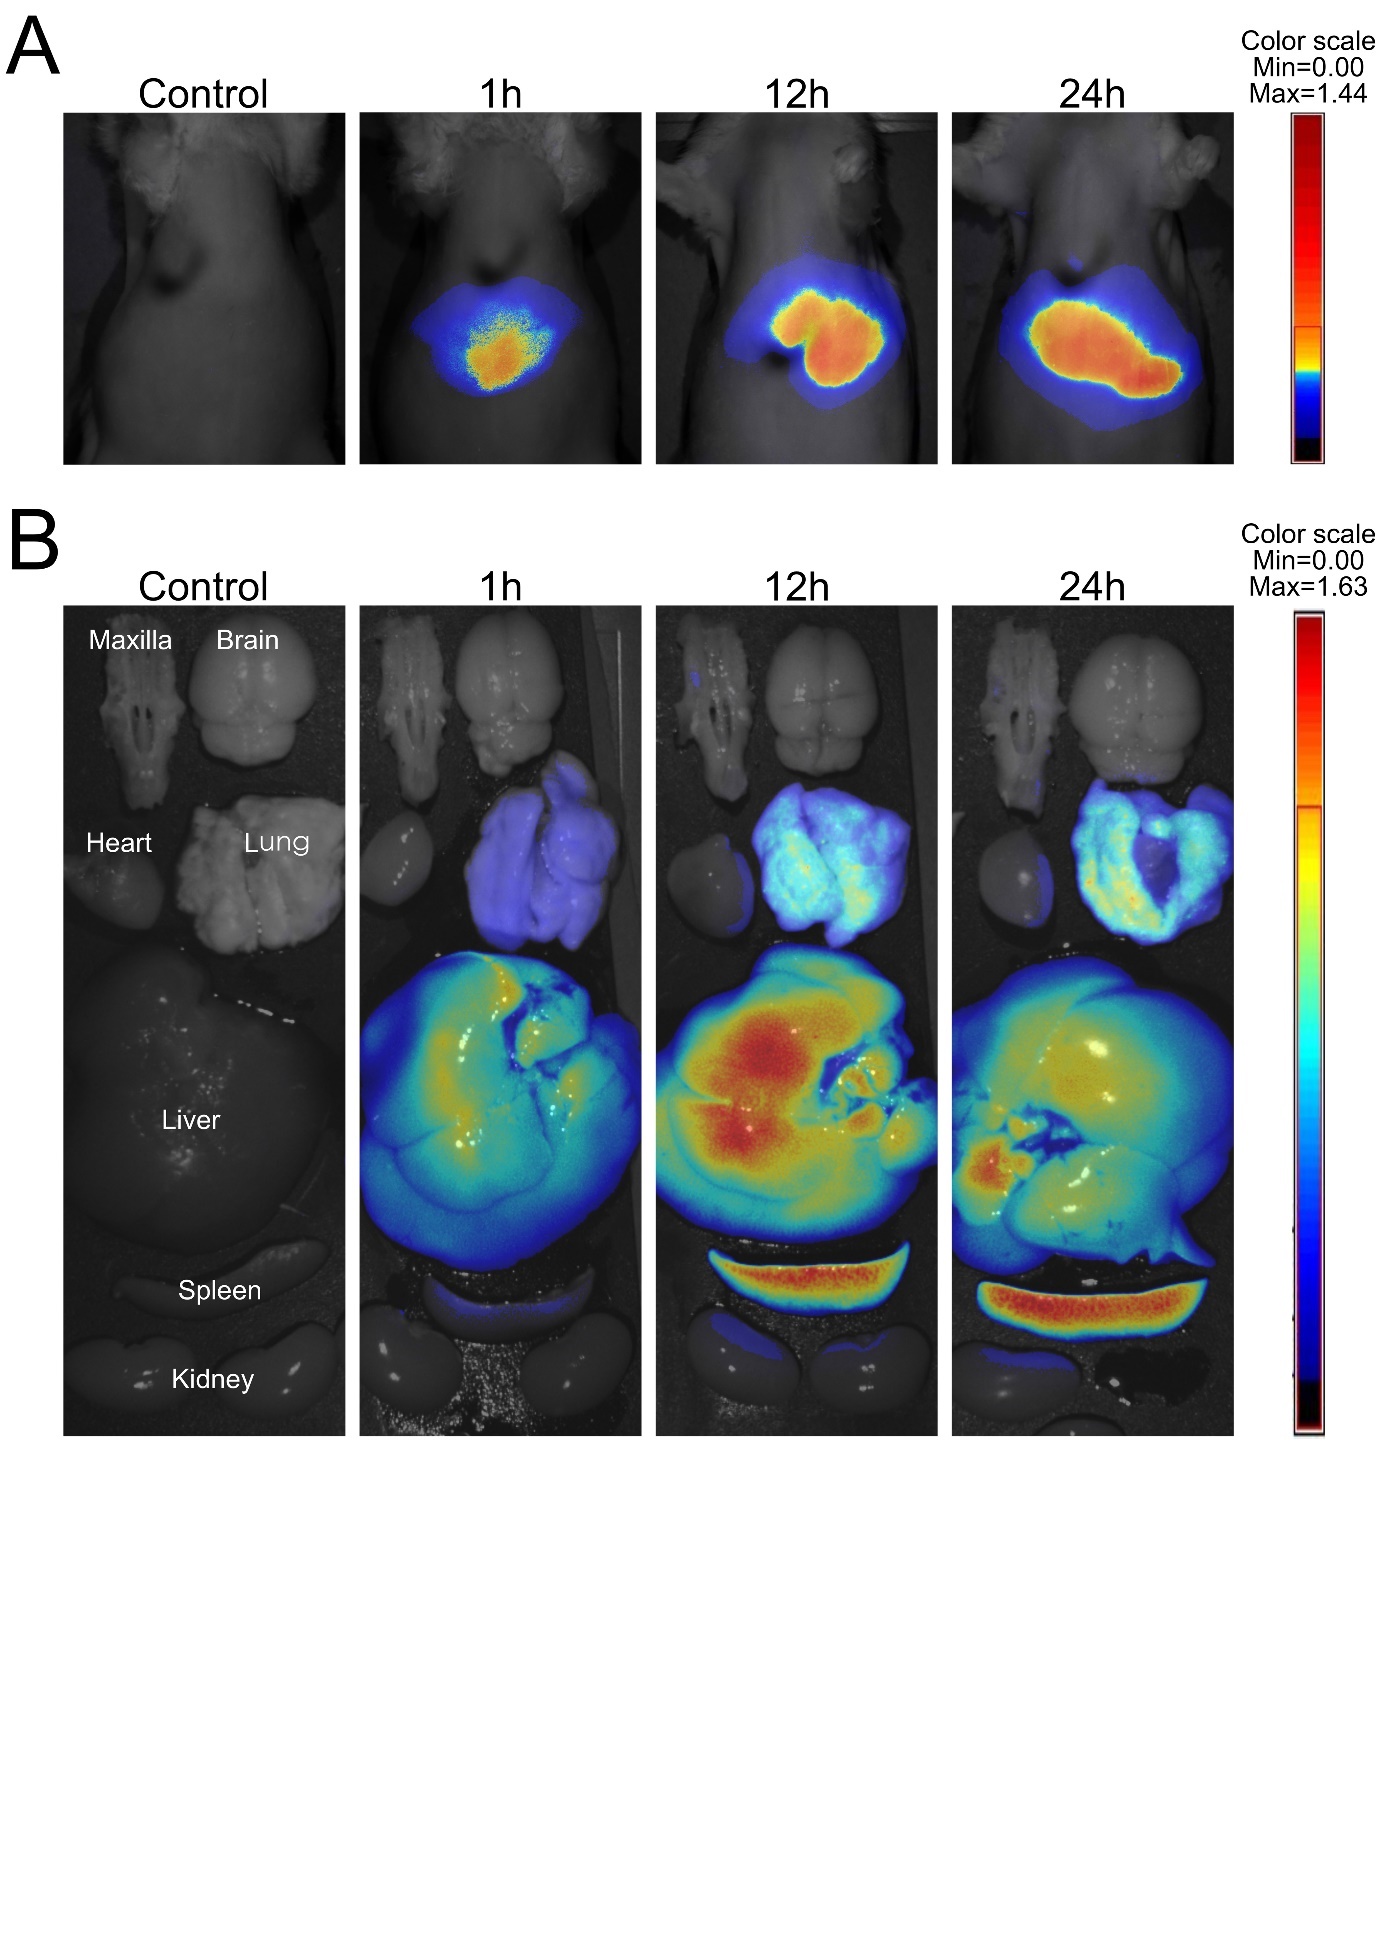
**Supplementary Figure S1.** Biodistribution of DiR-labeled sEV-AT. (A) Non-invasive live animal imaging in rats after intravenous injection of DiR-labeled sEV-AT. (B) Ex vivo images of major organs from rats after intravenous injection of DiR-labeled sEV-AT.

**Abbreviations:** sEV-AT, small extracellular vesicles derived from adipose tissue.
